# Supplementary material
Source: HighWire-hosted journal article supplement (https://www.ajevonline.org/highwire/filestream/11855/field_highwire_adjunct_files/0/Supplemental_Data.pdf)
Supplement: Supplemental_Data.pdf [file Supplemental_Data.pdf]

**Supplemental Data for:**

Casassa LF, Dermutz NP, Mawdsley PFW, Thompson M, Catania AA, Collins TS, Ashmore PL, du Fresne F, Gasic G and Dodson Peterson JC. 2021. Whole cluster and dried stem additions' effects on chemical and sensory properties of Pinot noir wines over two vintages. *Am J Enol Vitic* 72:21-35. doi: 10.5344/ajev.2020.20037.

**Supplemental Table 1** Harvest date and basic chemical composition of Pinot noir grapes (clone 777) at harvest over two consecutive vintages. Values represent the mean ( $\pm$  SEM) of four independent sample replicates taken at harvest (n = 30 berries).

| Vintage | Harvest date | Brix                | pH     | Titrateable acidity (g/L tartaric acid) | Tartaric acid (g/L) | Malic acid (g/L) |
|---------|--------------|---------------------|--------|-----------------------------------------|---------------------|------------------|
| 2016    | 13 Sept      | 23.9 a <sup>a</sup> | 3.61 a | 5.3 a                                   | 4.92 a              | 1.38 a           |
| 2017    | 12 Sept      | 24.3 a              | 3.68 a | 5.6 b                                   | 5.02 a              | 1.44 a           |
| p value | ---          | 0.331               | 0.111  | 0.024                                   | 0.411               | 0.102            |

<sup>a</sup>Different letters within a column indicate significant differences ( $p < 0.05$ ) assessed by Student's t-test.

**Supplemental Table 2** Double entry table showing the CIE L\*a\*b\* Color Difference ( $\Delta E^*$ ) in the individual wines after three and 15 months of bottle aging (BA) in Pinot noir wines of the 2016 vintage. Values are presented as mean of three replicated comparisons (n = 3).

| Treatment      | 3 months BA |        |                         |      | 15 months BA |        |         |      |
|----------------|-------------|--------|-------------------------|------|--------------|--------|---------|------|
|                | C           | 50% WC | 100% WC                 | DS   | C            | 50% WC | 100% WC | DS   |
| C <sup>a</sup> | ---         | 1.88   | <b>5.47<sup>b</sup></b> | 2.86 | ---          | 1.26   | 2.57    | 2.45 |
| 50% WC         | 1.88        | ---    | 4.22                    | 1.33 | 1.26         | ---    | 2.02    | 2.66 |
| 100% WC        | <b>5.47</b> | 4.22   | ---                     | 4.66 | 2.57         | 2.02   | ---     | 2.28 |
| DS             | 2.86        | 1.33   | 4.66                    | ---  | 2.45         | 2.66   | 2.28    | ---  |

<sup>a</sup>C: Control; WC: whole cluster; DS: dried stems.

<sup>b</sup>Numbers underlined in bold indicate a  $\Delta E^*$  resulting in a chromatic difference discernible by the human eye between any given pair of wines ( $\Delta E^* > 5$ ) (Pérez-Magariño and González-Sanjosé 2003).

**Supplemental Table 3** Double entry table showing the CIE L\*a\*b\* Color Difference ( $\Delta E^*$ ) in the individual wines after three and 15 months of bottle aging (BA) in Pinot noir wines of the 2017 vintage. Values are presented as mean of three replicated comparisons (n = 3).

| Treatment      | 3 months BA |                         |             |      | 15 months BA |        |         |      |
|----------------|-------------|-------------------------|-------------|------|--------------|--------|---------|------|
|                | C           | 50% WC                  | 100% WC     | DS   | C            | 50% WC | 100% WC | DS   |
| C <sup>a</sup> | ---         | <b>5.30<sup>b</sup></b> | <b>5.46</b> | 4.79 | ---          | 2.98   | 3.40    | 3.51 |
| 50% WC         | <b>5.30</b> | ---                     | 2.43        | 1.43 | 2.98         | ---    | 2.43    | 2.70 |
| 100% WC        | <b>5.46</b> | 2.43                    | ---         | 1.71 | 3.40         | 2.43   | ---     | 3.07 |
| DS             | 4.79        | 1.43                    | 1.71        | ---  | 3.51         | 2.70   | 3.07    | ---  |

<sup>a</sup>C: Control; WC: whole cluster; DS: dried stems.

<sup>b</sup>Numbers underlined in bold indicate a  $\Delta E^*$  resulting in a chromatic difference discernible by the human eye between any given pair of wines ( $\Delta E^* > 5$ ) (Pérez-Magariño and González-Sanjosé 2003).

**Supplemental Data for:**

Casassa LF, Dermutz NP, Mawdsley PFW, Thompson M, Catania AA, Collins TS, Ashmore PL, du Fresne F, Gasic G and Dodson Peterson JC. 2021. Whole cluster and dried stem additions' effects on chemical and sensory properties of Pinot noir wines over two vintages. *Am J Enol Vitic* 72:21-35. doi: 10.5344/ajev.2020.20037.

**Supplemental Table 4** Compound identification, Kovats retention index, and references of the volatile compounds found in Pinot noir wines.

| Compound identification                                           | NIST KI <sup>a</sup>   | Calculated KI | Reference(s)                                        |
|-------------------------------------------------------------------|------------------------|---------------|-----------------------------------------------------|
| 1-Butanol, 3-methyl-, acetate                                     | 1124-1126              |               | Tatsuka et al. 1990                                 |
| 1-Propanol, 2-methyl-                                             | 1092-1095              |               | Tatsuka et al. 1990                                 |
| 1-Butanol                                                         | 1150                   |               | Tatsuka et al. 1990                                 |
| 1-Butanol, 3-methyl-                                              | 1209-1211              | 1213.2        | Tatsuka et al. 1990                                 |
| Hexanoic acid, ethyl ester                                        | 1246                   | 1229.7        | Umano and Shibamoto 1998                            |
| 1-Pentanol                                                        | 1255-1256              | 1239.6        | Tatsuka et al. 1990                                 |
| Acetoin                                                           | 1286-1287              | 1286.4        | Tatsuka et al. 1990                                 |
| Heptanoic acid, ethyl ester                                       | 1332 <sup>b</sup>      | 1328.7        | Umano et al. 1986                                   |
| Ethyl (S)-(-)-Lactate                                             | 1356 <sup>c</sup>      | 1344.3        | Pena et al. 2005                                    |
| 1-Hexanol                                                         | 1356-1359              | 1356.1        | Tatsuka et al. 1990                                 |
| 5-Heptenal, 2,6-dimethyl-                                         | 1356-1389              | 1365.6        | Chida et al. 2004, Mookdasanit et al. 2003          |
| 3-Octanol                                                         | 1386 <sup>c</sup>      | 1388.2        | Mahmood et al. 2004                                 |
| Octanoic acid, ethyl ester                                        | 1441 <sup>b</sup>      | 1431.8        | Umano et al. 1986                                   |
| 1-Octen-3-ol                                                      | 1456                   | 1441.9        | Tatsuka et al. 1990                                 |
| Acetic acid                                                       | 1452-1461              | 1447.9        | Gurbuz et al. 2006                                  |
| 1-Heptanol                                                        | 1461-1462              | 1456.4        | Tatsuka et al. 1990                                 |
| Benzaldehyde                                                      | 1527-1529              | 1511.8        | Tatsuka et al. 1990                                 |
| Linalool                                                          | 1552                   | 1544.8        | Tatsuka et al. 1990                                 |
| 1-Octanol                                                         | 1564-1565              | 1557.3        | Umano and Shibamoto 1998                            |
| 2,3-Butanediol                                                    | 1544-1547              | 1575.4        | Tanaka et al. 2003                                  |
| Decanoic acid, ethyl ester                                        | 1643 <sup>b</sup>      | 1634.8        | Umano et al. 1986                                   |
| 1-Nonanol                                                         | 1666                   | 1658.6        | Tatsuka et al. 1990                                 |
| Butanedioic acid, diethyl ester                                   | 1694 <sup>d</sup>      | 1671.0        | Wong and Teng 1994                                  |
| 1-Propanol, 3-(methylthio)-                                       | 1702                   | 1709.7        | Ferrari et al. 2004                                 |
| TDN (1, 1, 5-Trimethyl-1, 2-dihydronaphthalene)                   | 1729                   | 1730.9        | Zhao et al. 2009                                    |
| Undecanoic acid ethyl ester                                       | 1732                   | 1739.6        | Welke et al. 2012                                   |
| Benzeneacetic acid, ethyl ester                                   | 1785                   | 1774.9        | Ferrari et al. 2004                                 |
| Succinic acid, butyl ethyl ester                                  | 1820 <sup>e</sup>      | 1787.7        | Vinogradov 2004                                     |
| Acetic acid, 2-phenylethyl ester                                  | 1822-1826              | 1806.2        | Tatsuka et al. 1990                                 |
| β-Damascenone                                                     | 1814-1840              | 1809.3        | Botelho et al. 2007, Petka et al. 2006              |
| Dodecanoic acid, ethyl ester                                      | 1847 <sup>b</sup>      | 1841.7        | Umano et al. 1986                                   |
| Hexanoic acid                                                     | 1849                   | 1845.6        | Rezende and Fraga 2003                              |
| Benzyl alcohol                                                    | 1885-1886              | 1871.6        | Tatsuka et al. 1990                                 |
| Butanedioic acid, ethyl 3-methylbutyl ester                       | 1901                   | 1894.3        | Ferrari et al. 2004                                 |
| Phenylethyl Alcohol                                               | 1919-1923              | 1901.9        | Tatsuka et al. 1990                                 |
| 2-Cyclopenten-1-one, 3-ethyl-2-hydroxy-                           | 1845-1924              | 1910.0        | Moon and Shibamoto 2009, Fujioka and Shibamoto 2006 |
| 2-Propenal, 3-(2,6,6-trimethyl-1-cyclohexen-1-yl)-                | 1952                   | 1934.6        | Zhao et al. 2009                                    |
| Whiskey lactone (2(3H)-Furanone, 5-butylidihydro-4-methyl-, cis-) | 1964                   | 1942.2        | Zhao et al. 2009                                    |
| γ-nonalactone (2(3H)-Furanone, dihydro-5-pentyl-)                 | 2020                   |               | Avsar et al. 2004                                   |
| Tetradecanoic acid, ethyl ester                                   | 2043 <sup>b</sup>      |               | Umano et al. 1986                                   |
| Octanoic acid                                                     | 2072-2089              |               | Gurbuz et al. 2006, Cho et al. 2006                 |
| Ethyl cinnamate (2-Propenoic acid, 3-phenyl-, ethyl ester)        | 2108-2127              |               | Osorio et al. 2006, Escudero and Etievant 1999      |
| Pentadecanoic acid, ethyl ester                                   | 2135                   |               | Ferrari et al. 2004                                 |
| Hexadecanoic acid, ethyl ester                                    | 2243 <sup>b</sup> 2270 |               | Umano et al. 1986, Rezende and Fraga 2003           |
| Ethyl 9-hexadecenoate                                             | 2269-2292              |               | Prompona et al. 2012                                |
| n-Decanoic acid                                                   | 2280-2284              |               | Moio et al. 2000                                    |
| Glycerin                                                          | 2314-2322              |               | Pozo-Bayon et al. 2007, Shimoda et al. 1995         |

**Supplemental Data for:**

Casassa LF, Dermutz NP, Mawdsley PFW, Thompson M, Catania AA, Collins TS, Ashmore PL, du Fresne F, Gasic G and Dodson Peterson JC. 2021. Whole cluster and dried stem additions' effects on chemical and sensory properties of Pinot noir wines over two vintages. *Am J Enol Vitic* 72:21-35. doi: 10.5344/ajev.2020.20037.

**Supplemental Table 4 (cont.)** Compound identification, Kovats retention index, and references of the volatile compounds found in Pinot noir wines.

| Compound identification                                           | NIST KI <sup>a</sup> | Calculated KI | Reference(s)                                 |
|-------------------------------------------------------------------|----------------------|---------------|----------------------------------------------|
| Heptadecanoic acid, ethyl ester                                   | 2340                 |               | Ferrari et al. 2004                          |
| Octadecanoic acid, ethyl ester                                    | 2455                 |               | Ferrari et al. 2004                          |
| Ethyl Oleate                                                      | 2476                 |               | Umano et al. 1995                            |
| (E)-9-Octadecenoic acid ethyl ester                               | 2476 <sup>f</sup>    |               | Ledauphin et al. 2004                        |
| Linoleic acid ethyl ester                                         | 2521                 |               | Umano et al. 1995                            |
| Vanillin                                                          | 2561-2602            |               | Lee and Noble 2003, Lin et al. 2002          |
| 9,12,15-Octadecatrienoic acid, ethyl ester, (Z,Z,Z)-              | 2613 <sup>c</sup>    |               | Kaya et al. 1999                             |
| Ethyl vanillate (Benzoic acid, 4-hydroxy-3-methoxy-, ethyl ester) | 2676                 |               | Ferreira et al. 2001                         |
| n-Hexadecanoic acid                                               | 2899-2946            |               | Moio and Addeo 1998, Shiratsuchi et al. 1994 |

<sup>a</sup>He carrier gas, DBWax column, temperature ramp.

<sup>b</sup>N<sub>2</sub> carrier gas.

<sup>c</sup>Innowax column.

<sup>d</sup>Supelcowax-10 column.

<sup>e</sup>Carbowax 20M column.

<sup>f</sup>ZB-Wax column.

**Supplemental Table 5** Attributes and detailed composition of the standards used during the training and formal evaluation sessions of the wines of the 2016 harvest.

| Attributes            | Description/Definitions included in each attribute                           | Standard composition                                                                                                                       | Solution                                                                              |
|-----------------------|------------------------------------------------------------------------------|--------------------------------------------------------------------------------------------------------------------------------------------|---------------------------------------------------------------------------------------|
| <b>Brown hue</b>      | Brown color hue of the wines                                                 | Cal Poly Pinot noir 2010                                                                                                                   | 750 mL Cal Poly Pinot noir 2010                                                       |
| <b>Red hue</b>        | Red color hue of the wines                                                   | 3 mL Red Food Coloring McCormick (Baltimore, MD)                                                                                           | 747 mL Franzia Chillable Red                                                          |
| <b>Herbal</b>         | Tea<br>Dust<br>Hay<br>Sage<br>Fennel                                         | 1.0 g Guayuan Green Tea (dried)<br>1.0 g culinary sage (dried)<br>0.5 g fennel (dried)                                                     | 750 mL Franzia (Ripon, CA) Chillable Red                                              |
| <b>Oak</b>            | Tobacco<br><br>Vanilla<br>Campfire<br>Maple<br>Sawdust<br>Molasses           | 250 mL DC 190 Boise Kit with (Cabernet Sauvignon experimental wine produced at Cal Poly)                                                   | 500 mL Franzia Chillable Red                                                          |
| <b>Vegetal</b>        | Fresh Vegetable<br>Stemmy<br><br>"Green"                                     | 6.0 grams Carignane Tendrils (green, fresh)<br>1.0 g Carignane tendrils dried in the oven (350°F, 10 minutes)                              | 750 mL Franzia Chillable Red                                                          |
| <b>Red Berry</b>      | Fresh Cherry<br><br>Dried Cherry<br><br>Strawberry<br>Cranberry<br>Raspberry | 100 mL Trader Joe's (Monrovia, CA) 100% Cranberry Juice (not from concentrate)<br>100 mL Trader Joe's 100% Cherry Juice (from concentrate) | 550 mL Franzia Chillable Red                                                          |
| <b>Cooked Vegetal</b> |                                                                              | Cal Poly Experiment wine Cabernet Sauvignon 2016 200% Microwaved Stem addition                                                             | 750 mL Cal Poly Experiment wine Cabernet Sauvignon 2016 200% Microwaved Stem addition |
| <b>Astringency</b>    |                                                                              | 3.5 g Alum McCormick                                                                                                                       | 750 mL Cal Poly Pinot noir 2015                                                       |

**Supplemental Data for:**

Casassa LF, Dermutz NP, Mawdsley PFW, Thompson M, Catania AA, Collins TS, Ashmore PL, du Fresne F, Gasic G and Dodson Peterson JC. 2021. Whole cluster and dried stem additions' effects on chemical and sensory properties of Pinot noir wines over two vintages. *Am J Enol Vitic* 72:21-35. doi: 10.5344/ajev.2020.20037.

**Supplemental Table 6** Attributes and detailed composition of the standards used during the training and formal evaluation sessions of the wines of the 2017 harvest.

| Attribute                     | Descriptor                    | Standard Composition                                                                   |
|-------------------------------|-------------------------------|----------------------------------------------------------------------------------------|
| <b>Color<sup>a</sup></b>      |                               |                                                                                        |
| Low brown hue                 | Low intensity of brown hue    | L* = 80.1; C* = 13.38; H* = 33.02; a* = 15.41; b* = 10.02                              |
| High brown hue                | High intensity of brown hue   | L* = 86.6; C* = 12.42; H* = 45.85; a* = 8.65; b* = 8.91                                |
| Red hue                       | Intensity of red hue          | L* = 78.7; C* = 22.24; H* = 6.8; a* = 22.09; b* = 2.63                                 |
| Purple hue                    | Intensity of purple hue       | L* = 31.5; C* = 41.05; H* = 6.41; a* = 68.75; b* = -6.92                               |
| <b>Saturation<sup>b</sup></b> |                               |                                                                                        |
| Low                           | Low color overall saturation  | C* = 7.40                                                                              |
| High                          | High color overall saturation | C* = 22.24                                                                             |
| <b>Aroma</b>                  |                               |                                                                                        |
| Red fruit <sup>c</sup>        | Red Fruit                     | 100 mL Trader Joes (Monrovia, CA) 100% Cranberry Juice (not from concentrate)          |
|                               | Tart Cherry                   |                                                                                        |
|                               | Bubble-Gum                    | 70 mL Trader Joes (Monrovia, CA) 100% Red Tart Cherry Juice (not from concentrate)     |
| Dark fruit <sup>d</sup>       | Carbonic                      |                                                                                        |
|                               | Prune                         | 58.5 g Driscoll's (Watsonville, CA) Blackberries                                       |
|                               | Blueberry                     |                                                                                        |
|                               | Black Currant                 | 0.75 g Torani (San Francisco, CA) Blackberry Syrup                                     |
| Dried fruit <sup>d</sup>      | Plum                          |                                                                                        |
|                               | Blackberry                    | 0.45 g Smirnoff (Norwalk, CT) Twist of Blue Berry                                      |
|                               | Dried Fruit                   | 30 g Sunsweet (Yuba City, CA) Amazin Prunes (pitted, chopped)                          |
|                               | Dried Apricot                 |                                                                                        |
| Vegetal <sup>c</sup>          | Fruit Leather                 | 25 g P\$T (Cincinnati, OH) Raisins (chopped)                                           |
|                               | Vegetal                       | 10 g Made in Nature (Boulder, CO) Apricots in the Buff (organic dried fruit) (chopped) |
|                               | Green                         | 22 g Green Bell Pepper (chopped)                                                       |
| Clove <sup>c</sup>            | Stemmy                        | 10 g red Bell Pepper (chopped)                                                         |
|                               | Clove                         | 0.15 g Frontier (Norway, IA) Cloves (ground)                                           |
| Spice                         |                               |                                                                                        |
|                               |                               |                                                                                        |
| <b>Astringency</b>            |                               |                                                                                        |
| Low                           |                               | 34 mg/L protein precipitable tannins (Harbertson et al. 2003)                          |
| High                          |                               | 446 mg/L protein precipitable tannins (Harbertson et al. 2003)                         |

<sup>a</sup>Low brown standard wine: 500 mL Cal Poly Pinot noir 2015 added with 250 mL Cal Poly Pinot noir 2010. High brown standard wine: Cal Poly Pinot noir 2010. Red hue standard wine: 750 mL Cal Poly Pinot noir 2015 added with 850 µL HCL. Purple hue standard wine: 750 mL Cal Poly Pinot noir 2015 added 50 mL Mega Purple diluted stock solution. Units expressed in CIE L\*a\*b\* tri-stimulus colorimetry values.

<sup>b</sup>Low saturation standard wine: 750 mL Cal Poly Pinot noir 2015 added with 15 mL 50 mg/L SO<sub>2</sub>. High saturation standard wine: 750 mL Cal Poly Pinot noir 2015 added with 850 µL HCL. Units expressed in CIE L\*a\*b\* tri-stimulus colorimetry values.

<sup>c</sup>Aroma standards prepared with 500 mL Vella Burgundy.

<sup>d</sup>Aroma standards prepared with 750 mL Vella Burgundy.

### Supplemental Data for:

Casassa LF, Dermutz NP, Mawdsley PFW, Thompson M, Catania AA, Collins TS, Ashmore PL, du Fresne F, Gasic G and Dodson Peterson JC. 2021. Whole cluster and dried stem additions' effects on chemical and sensory properties of Pinot noir wines over two vintages. *Am J Enol Vitic* 72:21-35. doi: 10.5344/ajev.2020.20037.

**Supplemental Table 7** Detailed volatile composition determined by gas chromatography-mass spectrometry of Pinot noir wines of the 2016 vintage after 24 months of bottle aging. Also shown is a one-way analysis of variance (ANOVA). Values represent the mean of three tank replicates with each sample injected three times and are expressed as relative internal standard (ISTD) abundance.

| Compound/treatment                                                    | C                    | 50% WC <sup>a</sup> | 100% WC  | DS       | p value      |
|-----------------------------------------------------------------------|----------------------|---------------------|----------|----------|--------------|
| <b>Alcohols</b>                                                       |                      |                     |          |          |              |
| Isobutanol                                                            | 0.037 b <sup>b</sup> | 0.119 ab            | 0.195 a  | 0.130 ab | <u>0.106</u> |
| 1-Pentanol                                                            | 2.248 a              | 1.254 a             | 0.695 a  | 1.083 a  | 0.564        |
| 1-Butanol                                                             | 0.028 a              | 0.027 a             | 0.038 a  | 0.031 a  | 0.340        |
| 1-Hexanol                                                             | 0.384 a              | 0.283 b             | 0.187 c  | 0.370 a  | <b>0.001</b> |
| 1-Heptanol                                                            | 0.016 a              | 0.018 a             | 0.015 a  | 0.016 a  | 0.307        |
| 1-Octanol                                                             | 0.020 a              | 0.023 a             | 0.022 a  | 0.021 a  | 0.293        |
| 1-Nonanol                                                             | 0.021 ab             | 0.018 b             | 0.019 b  | 0.027 a  | <b>0.039</b> |
| 1-Octen-3-ol                                                          | 0.036 b              | 0.126 ab            | 0.355 a  | 0.111 ab | <u>0.105</u> |
| Benzyl alcohol                                                        | 0.100 a              | 0.103 a             | 0.103 a  | 0.122 a  | 0.312        |
| 3-Octanol                                                             | 0.004 b              | 0.009 b             | 0.018 a  | 0.007 b  | <b>0.032</b> |
| Phenylethyl alcohol                                                   | 2.137 a              | 2.341 a             | 2.117 a  | 2.259 a  | 0.811        |
| Isoamyl alcohol                                                       | 3.575 a              | 3.738 a             | 3.103 a  | 3.457 a  | 0.547        |
| <b>Aldehydes, thiols and others</b>                                   |                      |                     |          |          |              |
| Acetoin                                                               | 0.034 a              | 0.022 a             | 0.021 a  | 0.028 a  | 0.181        |
| 2,3-Butanediol                                                        | 0.416 a              | 0.364 a             | 0.451 a  | 0.615 a  | 0.224        |
| Glycerin                                                              | 0.521 a              | 0.576 a             | 0.577 a  | 0.802 a  | 0.728        |
| Melonal                                                               | 0.004 a              | 0.003 ab            | 0.002 b  | 0.004 a  | <b>0.045</b> |
| Benzaldehyde                                                          | 0.028 a              | 0.020 ab            | 0.015 b  | 0.023 ab | <u>0.072</u> |
| Methionol                                                             | 0.015 a              | 0.012 b             | 0.011 b  | 0.012 b  | <b>0.020</b> |
| 2-Propenal, 3-(2,6,6-trimethyl-1-cyclohexen-1-yl)                     | 0.033 a              | 0.038 a             | 0.041 a  | 0.035 a  | 0.805        |
| <b>Esters</b>                                                         |                      |                     |          |          |              |
| Ethyl-lactate                                                         | 2.040 a              | 1.990 a             | 1.622 a  | 2.093 a  | 0.346        |
| Ethyl 9-hexadecenoate                                                 | 0.218 ab             | 0.102 b             | 0.027 b  | 0.369 a  | <b>0.020</b> |
| 9-Octadecenoic acid ethyl ester                                       | 0.030 a              | 0.023 a             | 0.027 a  | 0.044 a  | 0.536        |
| 1-Butanol, 3-methyl-, acetate (isoamyl acetate)                       | 0.102 b              | 0.174 a             | 0.199 a  | 0.147 ab | <u>0.064</u> |
| Octadecatrienoic acid, ethyl ester (linolenic acid, ethyl ester)      | 0.004 b              | 0.001 b             | 0.003 b  | 0.009 a  | <b>0.017</b> |
| Linoleic acid, ethyl ester                                            | 0.032 ab             | 0.007 b             | 0.016 b  | 0.052 a  | <b>0.017</b> |
| Ethyl-oleate                                                          | 0.051 a              | 0.025 ab            | 0.022 b  | 0.045 ab | <u>0.083</u> |
| Hexanoic acid, ethyl ester (ethyl caproate)                           | 0.535 a              | 0.560 a             | 0.464 a  | 0.490 a  | 0.384        |
| Heptanoic acid, ethyl ester (ethyl enanthate)                         | 0.009 a              | 0.010 a             | 0.008 a  | 0.010 a  | 0.349        |
| Octanoic acid, ethyl ester (ethyl caprylate)                          | 1.160 b              | 1.703 a             | 1.795 a  | 1.130 b  | <b>0.019</b> |
| Decanoic acid, ethyl ester (ethyl caprate)                            | 0.423 b              | 0.587 b             | 0.946 a  | 0.644 b  | <b>0.013</b> |
| Dodecanoic acid, ethyl ester (ethyl laurate)                          | 0.045 a              | 0.049 a             | 0.066 a  | 0.066 a  | 0.318        |
| Tetradecanoic acid, ethyl ester (ethyl myristate)                     | 0.101 ab             | 0.081 b             | 0.087 ab | 0.149 a  | 0.141        |
| Pentadecanoic acid, ethyl ester (ethyl pentadecanoate)                | 0.023 b              | 0.024 b             | 0.030 ab | 0.044 a  | <u>0.083</u> |
| Hexadecanoic acid, ethyl ester (ethyl palmitate)                      | 1.896 ab             | 1.474 b             | 1.211 b  | 2.928 a  | <u>0.055</u> |
| Heptadecanoic acid, ethyl ester (ethyl heptadecanoate)                | 0.928 a              | 0.513 a             | 0.330 a  | 0.976 a  | <b>0.393</b> |
| Octadecanoic acid, ethyl ester (ethyl stearate)                       | 0.641 a              | 0.496 a             | 0.498 a  | 0.877 a  | 0.406        |
| Benzeneacetic acid, ethyl ester (ethyl phenyl acetate)                | 0.025 a              | 0.023 a             | 0.027 a  | 0.028 a  | 0.557        |
| Butanedioic acid, diethyl ester (diethyl succinate)                   | 2.582 c              | 3.583 a             | 3.296 ab | 2.824 bc | <b>0.041</b> |
| Acetic acid, 2-phenylethyl ester (phenethyl acetate)                  | 0.047 b              | 0.062 ab            | 0.078 a  | 0.060 b  | <b>0.024</b> |
| Succinic acid, butyl ethyl ester (butyl ethyl succinate)              | 0.024 a              | 0.030 a             | 0.031 a  | 0.025 a  | 0.304        |
| Butanedioic acid, ethyl 3-methylbutyl ester (ethyl isoamyl succinate) | 0.105 b              | 0.156 a             | 0.132 ab | 0.108 b  | <u>0.098</u> |
| 2-Propenoic acid, 3-phenyl-, ethyl ester (ethyl cinnamate)            | 0.003 c              | 0.019 b             | 0.026 a  | 0.007 c  | <0.0001      |
| Undecanoic acid, ethyl ester                                          | 0.000 a              | 0.000 a             | 0.001 a  | 0.001 a  | 0.652        |
| <b>Organic acids</b>                                                  |                      |                     |          |          |              |
| Acetic acid                                                           | 0.707 b              | 0.812 ab            | 1.093 a  | 1.000 ab | <u>0.135</u> |
| Hexanoic acid (caproic acid)                                          | 0.101 a              | 0.084 a             | 0.074 a  | 0.093 a  | 0.275        |

Continued on next page

### Supplemental Data for:

Casassa LF, Dermutz NP, Mawdsley PFW, Thompson M, Catania AA, Collins TS, Ashmore PL, du Fresne F, Gasic G and Dodson Peterson JC. 2021. Whole cluster and dried stem additions' effects on chemical and sensory properties of Pinot noir wines over two vintages. *Am J Enol Vitic* 72:21-35. doi: 10.5344/ajev.2020.20037.

**Supplemental Table 7 (cont.)** Detailed volatile composition determined by gas chromatography-mass spectrometry of Pinot noir wines of the 2016 vintage after 24 months of bottle aging. Also shown is a one-way analysis of variance (ANOVA). Values represent the mean of three tank replicates with each sample injected three times and are expressed as relative internal standard (ISTD) abundance.

| Compound/treatment                                                             | C        | 50% WC <sup>a</sup> | 100% WC  | DS       | <i>p</i> value |
|--------------------------------------------------------------------------------|----------|---------------------|----------|----------|----------------|
| <b>Organic acids</b>                                                           |          |                     |          |          |                |
| Octanoic acid (caprylic acid)                                                  | 0.360 a  | 0.432 a             | 0.452 a  | 0.318 a  | 0.200          |
| n-Decanoic acid (capric acid)                                                  | 0.082 a  | 0.056 a             | 0.053 a  | 0.088 a  | 0.517          |
| n-Hexadecanoic acid (palmitic acid)                                            | 0.024 a  | 0.018 a             | 0.019 a  | 0.037 a  | 0.570          |
| <b>Terpenes, terpenoids and nor-isoprenoids</b>                                |          |                     |          |          |                |
| (2,6,6-Trimethyl-1,3-cyclohexadien-1-yl)-2-buten-1-one ( $\beta$ -damascenone) | 0.034 a  | 0.040 a             | 0.033 a  | 0.032 a  | 0.808          |
| Linalool                                                                       | 0.005 ab | 0.004 b             | 0.006 a  | 0.005 ab | <u>0.163</u>   |
| 1, 1, 5-Trimethyl-1, 2-dihydronaphthalene (TDN)                                | 0.006 a  | 0.011 a             | 0.011 a  | 0.010 a  | 0.222          |
| <b>Volatile phenols, lactones and oak aromatics</b>                            |          |                     |          |          |                |
| $\gamma$ -nonalactone                                                          | 0.018 b  | 0.021 ab            | 0.020 b  | 0.031 a  | <u>0.095</u>   |
| Whiskey lactone                                                                | 0.048 a  | 0.084 a             | 0.059 a  | 0.045 a  | 0.517          |
| 2-Cyclopenten-1-one, 3-ethyl-2-hydroxy-                                        | 0.006 b  | 0.010 ab            | 0.010 ab | 0.011 a  | <u>0.189</u>   |
| Ethyl-vanillate                                                                | 0.019 a  | 0.029 a             | 0.047 a  | 0.059 a  | 0.322          |
| Vanillin                                                                       | 0.003 a  | 0.005 a             | 0.007 a  | 0.007 a  | 0.190          |

<sup>a</sup>C: Control; WC: whole cluster; DS: dried stems.

<sup>b</sup>Different letters within wines of the different treatments indicate significant differences for Fisher's least significant difference test and  $p < 0.05$ . Significant  $p$  values are shown in bold.

**Supplemental Table 8** Detailed volatile composition determined by gas chromatography-mass spectrometry of Pinot noir wines of the 2017 vintage after 12 months of bottle aging. Also shown is a one-way analysis of variance (ANOVA). Values represent the mean of three tank replicates with each sample injected three times and are expressed as relative internal standard (ISTD) abundance.

| Compound/treatment                                | C                    | 50% WC <sup>a</sup> | 100% WC  | DS      | <i>p</i> value |
|---------------------------------------------------|----------------------|---------------------|----------|---------|----------------|
| <b>Alcohols</b>                                   |                      |                     |          |         |                |
| Isobutanol                                        | 0.214 a <sup>b</sup> | 0.199 a             | 0.065 a  | 0.178 a | 0.386          |
| 1-Pentanol                                        | 0.473 a              | 0.794 a             | 1.613 a  | 1.265 a | 0.617          |
| 1-Butanol                                         | 0.021 a              | 0.024 a             | 0.029 a  | 0.025 a | 0.333          |
| 1-Hexanol                                         | 0.352 a              | 0.299 a             | 0.324 a  | 0.348 a | 0.506          |
| 1-Heptanol                                        | 0.024 ab             | 0.024 ab            | 0.019 b  | 0.026 a | <u>0.179</u>   |
| 1-Octanol                                         | 0.022 a              | 0.023 a             | 0.023 a  | 0.023 a | 0.968          |
| 1-Nonanol                                         | 0.027 a              | 0.026 a             | 0.026 a  | 0.029 a | 0.259          |
| 1-Octen-3-ol                                      | 0.045 a              | 0.014 a             | 0.017 a  | 0.016 a | 0.341          |
| Benzyl alcohol                                    | 0.105 a              | 0.104 a             | 0.111 a  | 0.107 a | 0.693          |
| 3-Octanol                                         | 0.008 a              | 0.011 a             | 0.006 a  | 0.002 a | 0.374          |
| Phenylethyl alcohol                               | 2.810 a              | 2.736 ab            | 2.670 ab | 2.250 b | <u>0.167</u>   |
| Isoamyl alcohol                                   | 3.781 a              | 3.625 a             | 3.578 a  | 3.350 a | 0.865          |
| <b>Aldehydes, thiols and others</b>               |                      |                     |          |         |                |
| Acetoin                                           | 0.088 b              | 0.135 ab            | 0.160 a  | 0.153 a | <u>0.066</u>   |
| 2,3-Butanediol                                    | 0.475 b              | 0.432 b             | 0.781 a  | 0.493 b | <u>0.064</u>   |
| Glycerin                                          | 0.905 a              | 0.619 a             | 1.178 a  | 0.633 a | 0.444          |
| Melonal                                           | 0.002 a              | 0.002 a             | 0.002 a  | 0.002 a | 0.796          |
| Benzaldehyde                                      | 0.034 b              | 0.044 b             | 0.082 a  | 0.045 b | <b>0.007</b>   |
| Methionol                                         | 0.016 a              | 0.016 a             | 0.015 a  | 0.015 a | 0.854          |
| 2-Propenal, 3-(2,6,6-trimethyl-1-cyclohexen-1-yl) | 0.062 a              | 0.052 ab            | 0.032 b  | 0.038 b | <u>0.051</u>   |
| <b>Esters</b>                                     |                      |                     |          |         |                |
| Ethyl-lactate                                     | 1.793 a              | 1.766 a             | 1.773 a  | 1.852 a | 0.989          |
| Ethyl 9-hexadecenoate                             | 0.101 a              | 0.082 a             | 0.129 a  | 0.189 a | 0.540          |
| 9-Octadecenoic acid ethyl ester                   | 0.070 a              | 0.082 a             | 0.061 a  | 0.149 a | 0.234          |

Continued on next page

**Supplemental Data for:**

Casassa LF, Dermutz NP, Mawdsley PFW, Thompson M, Catania AA, Collins TS, Ashmore PL, du Fresne F, Gasic G and Dodson Peterson JC. 2021. Whole cluster and dried stem additions' effects on chemical and sensory properties of Pinot noir wines over two vintages. *Am J Enol Vitic* 72:21-35. doi: 10.5344/ajev.2020.20037.

**Supplemental Table 8 (cont.)** Detailed volatile composition determined by gas chromatography-mass spectrometry of Pinot noir wines of the 2017 vintage after 12 months of bottle aging. Also shown is a one-way analysis of variance (ANOVA). Values represent the mean of three tank replicates with each sample injected three times and are expressed as relative internal standard (ISTD) abundance.

| Compound/treatment                                                             | C        | 50% WC <sup>a</sup> | 100% WC  | DS       | p value           |
|--------------------------------------------------------------------------------|----------|---------------------|----------|----------|-------------------|
| <b>Esters</b>                                                                  |          |                     |          |          |                   |
| 1-Butanol, 3-methyl-, acetate (isoamyl acetate)                                | 0.183 a  | 0.194 a             | 0.186 a  | 0.152 a  | 0.378             |
| Octadecatrienoic acid, ethyl ester (linolenic acid, ethyl ester)               | 0.025 c  | 0.065 b             | 0.028 c  | 0.114 a  | <b>&lt;0.0001</b> |
| Linoleic acid, ethyl ester                                                     | 0.148 c  | 0.287 b             | 0.138 c  | 0.421 a  | <b>&lt;0.0001</b> |
| Ethyl-oleate                                                                   | 0.136 bc | 0.186 b             | 0.089 c  | 0.247 a  | <b>0.001</b>      |
| Hexanoic acid, ethyl ester (ethyl caproate)                                    | 0.384 a  | 0.377 a             | 0.310 a  | 0.406 a  | 0.416             |
| Heptanoic acid, ethyl ester (ethyl enanthate)                                  | 0.008 a  | 0.008 a             | 0.009 a  | 0.009 a  | 0.694             |
| Octanoic acid, ethyl ester (ethyl caprylate)                                   | 0.872 a  | 0.773 ab            | 0.621 b  | 0.789 ab | <u>0.145</u>      |
| Decanoic acid, ethyl ester (ethyl caprate)                                     | 0.362 a  | 0.389 a             | 0.256 a  | 0.341 a  | 0.346             |
| Dodecanoic acid, ethyl ester (ethyl laurate)                                   | 0.038 bc | 0.062 ab            | 0.027 c  | 0.075 a  | <b>0.008</b>      |
| Tetradecanoic acid, ethyl ester (ethyl myristate)                              | 0.104 b  | 0.183 a             | 0.086 b  | 0.237 a  | <b>0.004</b>      |
| Pentadecanoic acid, ethyl ester (ethyl pentadecanoate)                         | 0.034 b  | 0.050 a             | 0.027 b  | 0.058 a  | <b>0.003</b>      |
| Hexadecanoic acid, ethyl ester (ethyl palmitate)                               | 3.059 c  | 4.176 b             | 2.845 c  | 4.865 a  | <b>0.000</b>      |
| Heptadecanoic acid, ethyl ester (ethyl heptadecanoate)                         | 0.854 a  | 1.438 a             | 1.382 a  | 1.218 a  | 0.746             |
| Octadecanoic acid, ethyl ester (ethyl stearate)                                | 1.068 a  | 1.141 a             | 0.895 a  | 1.162 a  | 0.244             |
| Benzeneacetic acid, ethyl ester (ethyl phenyl acetate)                         | 0.035 a  | 0.033 a             | 0.026 a  | 0.028 a  | 0.198             |
| Butanedioic acid, diethyl ester (diethyl succinate)                            | 3.179 a  | 2.743 a             | 1.608 b  | 2.318 ab | <b>0.027</b>      |
| Acetic acid, 2-phenylethyl ester (phenethyl acetate)                           | 0.085 a  | 0.091 a             | 0.093 a  | 0.069 a  | 0.185             |
| Succinic acid, butyl ethyl ester (butyl ethyl succinate)                       | 0.021 a  | 0.020 ab            | 0.014 bc | 0.014 c  | <b>0.039</b>      |
| Butanedioic acid, ethyl 3-methylbutyl ester (ethyl isoamyl succinate)          | 0.126 a  | 0.121 a             | 0.073 b  | 0.088 ab | <u>0.053</u>      |
| 2-Propenoic acid, 3-phenyl-, ethyl ester (ethyl cinnamate)                     | 0.005 c  | 0.011 b             | 0.014 a  | 0.010 b  | <b>&lt;0.0001</b> |
| Undecanoic acid, ethyl ester                                                   | 0.011 a  | 0.012 a             | 0.013 a  | 0.011 a  | 0.967             |
| <b>Organic acids</b>                                                           |          |                     |          |          |                   |
| Acetic acid                                                                    | 0.966 a  | 1.055 a             | 1.352 a  | 1.034 a  | 0.327             |
| Hexanoic acid (caproic acid)                                                   | 0.064 a  | 0.062 a             | 0.051 a  | 0.062 a  | 0.679             |
| Octanoic acid (caprylic acid)                                                  | 0.318 a  | 0.312 a             | 0.239 a  | 0.209 a  | 0.206             |
| n-Decanoic acid (capric acid)                                                  | 0.075 a  | 0.080 a             | 0.099 a  | 0.109 a  | 0.776             |
| n-Hexadecanoic acid (palmitic acid)                                            | 0.051 a  | 0.048 a             | 0.051 a  | 0.038 a  | 0.674             |
| <b>Terpenes, terpenoids and nor-isoprenoids</b>                                |          |                     |          |          |                   |
| (2,6,6-Trimethyl-1,3-cyclohexadien-1-yl)-2-buten-1-one ( $\beta$ -damascenone) | 0.058 a  | 0.048 ab            | 0.039 b  | 0.043 b  | <u>0.061</u>      |
| Linalool                                                                       | 0.003 b  | 0.005 ab            | 0.008 a  | 0.007 ab | <u>0.079</u>      |
| 1, 1, 5-Trimethyl-1, 2-dihydronaphthalene (TDN)                                | 0.021 a  | 0.023 a             | 0.013 a  | 0.019 a  | 0.212             |
| <b>Volatile phenols, lactones and oak aromatics</b>                            |          |                     |          |          |                   |
| $\gamma$ -nonalactone                                                          | 0.036 a  | 0.037 a             | 0.033 a  | 0.040 a  | 0.371             |
| Whiskey lactone                                                                | 0.080 a  | 0.087 a             | 0.034 a  | 0.078 a  | 0.196             |
| 2-Cyclopenten-1-one, 3-ethyl-2-hydroxy-                                        | 0.011 a  | 0.011 a             | 0.010 a  | 0.012 a  | 0.836             |
| Ethyl-vanillate                                                                | 0.059 a  | 0.051 a             | 0.054 a  | 0.047 a  | 0.747             |
| Vanillin                                                                       | 0.009 ab | 0.009 ab            | 0.006 b  | 0.010 a  | <u>0.171</u>      |

<sup>a</sup>C: Control; WC: whole cluster; DS: dried stems.

<sup>b</sup>Different letters within wines of the different treatments indicate significant differences for Fisher's least significant difference test and  $p < 0.05$ . Significant  $p$  values are shown in bold.

### **Supplemental Data for:**

Casassa LF, Dermutz NP, Mawdsley PFW, Thompson M, Catania AA, Collins TS, Ashmore PL, du Fresne F, Gasic G and Dodson Peterson JC. 2021. Whole cluster and dried stem additions' effects on chemical and sensory properties of Pinot noir wines over two vintages. *Am J Enol Vitic* 72:21-35. doi: 10.5344/ajev.2020.20037.

---

---

## **Supplemental References**

### **Tables 2 and 3**

Peñez-Magariño S and González-Sanjose ML. 2003. Application of absorbance values used in wineries for estimating CIELAB parameters in red wines. *Food Chem* 81:301-306.

### **Table 4**

Avsar YK, Karagul-Yuceer Y, Drake MA, Singh TK, Yoon Y and Cadwallader KR. 2004. Characterization of nutty flavor in cheddar cheese. *J Dairy Sci* 87:1999-2010.

Botelho G, Caldeira I, Mendes-Faia A and Clímaco MC. 2007. Evaluation of two quantitative gas chromatography-olfactometry methods for clonal red wines differentiation. *Flavour Fragr J* 22:414-420.

Chida M, Sone Y and Tamura H. 2004. Aroma characteristics of stored tobacco cut leaves analyzed by a high vacuum distillation and canister system. *J Agric Food Chem* 26:7918-7924.

Cho IH, Choi HK and Kim YS. 2006. Difference in the volatile composition of pine-mushrooms (*Tricholoma matsutake* Sing.) according to their grades. *J Agric Food Chem* 54:4820-4825.

Escudero A and Etiévant P. 1999. Effect of antioxidants on the flavor characteristics and the gas chromatography/olfactometry profiles of Champagne extracts. *J Agric Food Chem* 47:3303-3308.

Ferrari G, Lablanquie O, Cantagrel R, Ledauphin J, Payot T, Fournier N and Guichard E. 2004. Determination of key odorant compounds in freshly distilled Cognac using GC-O, GC-MS, and sensory evaluation. *J Agric Food Chem* 52:5670-5676.

Ferreira V, Aznar M, López R and Cacho J. 2001. Quantitative gas chromatography-olfactometry carried out at different dilutions of an extract. Differences in the odor profiles of four high-quality Spanish aged red wines. *J. Agric Food Chem* 49:4818-4824.

Fujioka K and Shibamoto T. 2006. Quantitation of volatiles and nonvolatile acids in an extract from coffee beverages: Correlation with antioxidant activity. *J Agric Food Chem* 54:6054-6058.

Gurbuz O, Rouseff JM and Rouseff RL. 2006. Comparison of aroma volatiles in commercial Merlot and Cabernet Sauvignon wines using gas chromatography - Olfactometry and gas chromatography - Mass spectrometry. *J Agric Food Chem* 54:3990-3996.

Kaya A, Baser KHC and Koca F. 1999. Essential oils of *Acinos troodi* (Post) Leblebici subsp. *vardaranus* Leblebici and subsp. *grandiflorus* Hartvig Strid. *Flavour Fragr J* 14:50-54.

Ledauphin J, Saint-Clair JF, Lablanquie O, Guichard H, Founier N, Guichard E and Barillier D. 2004. Identification of trace volatile compounds in freshly distilled Calvados and Cognac using preparative separations coupled with gas chromatography-mass spectrometry. *J Agric Food Chem* 52:5124-5134.

Lee SJ and Noble AC. 2003. Characterization of odor-active compounds in Californian Chardonnay wines using GC-olfactometry and GC-mass spectrometry. *J Agric Food Chem* 51:8036-8044.

Lin J, Rouseff RL, Barros S and Naim M. 2002. Aroma composition changes in early season grapefruit juice produced from thermal concentration. *J Agric Food Chem* 50:813-819.

Mahmood U, Kaul VK and Acharya R. 2004. Volatile constituents of *Capillipedium parviflorum*. *Phytochemistry* 14:2163-2166.

Moio L and Addeo F. 1998. Grana Padano cheese aroma. *J Dairy Res* 65:317-333.

Moio L, Piombino P and Addeo F. 2000. Odour-impact compounds of Gorgonzola cheese. *J Dairy Res* 67:273-285.

Mookdasanit J, Tamura H, Yoshizawa T, Tokunaga T and Nakanishi K. 2003. Trace volatile compounds in essential oil of Citrus Sudachi by means of modified solvent extraction method. *Food Sci Technol Res* 1:54-61.

Moon JK and Shibamoto T. 2009. Antioxidant assays for plant and food components. *J Agric Food Chem* 57:1655-1666.

Osorio C, Alarcon M, Moreno C, Bonilla A, Barrios J, Garzon C and Duque C. 2006. Characterization of Odor-Active Volatiles in Champa (*Campanesia lineatifolia* R. P.). *J Agric Food Chem* 54:509-516.

Pena R, Barciela J, Herrero C and Garcia-Martin S. 2005. Optimization of solid-phase microextraction methods for GC-MS determination of terpenes in wine. *J Sci Food Agric* 85:1227-1234.

Petka J, Ferreira V, González-Viñas MA and Cacho J. 2006. Sensory and chemical characterization of the aroma of a white wine made with Devín grapes. *J Agric Food Chem* 54:909-915.



### ***Supplemental Data for:***

Casassa LF, Dermutz NP, Mawdsley PFW, Thompson M, Catania AA, Collins TS, Ashmore PL, du Fresne F, Gasic G and Dodson Peterson JC. 2021. Whole cluster and dried stem additions' effects on chemical and sensory properties of Pinot noir wines over two vintages. *Am J Enol Vitic* 72:21-35. doi: 10.5344/ajev.2020.20037.

---

### **Supplemental References *continued***

- Pozo-Bayon MA, Ruiz-Rodriguez A, Pernin K and Cayot N. 2007. Influence of eggs on the aroma composition of a sponge cake and on the aroma release in model studies on flavored sponge cakes. *J Agric Food Chem* 55:1418-1426.
- Prompona KD, Kandylis P, Tsakiris A, Kanellaki M and Kourkoutas Y. 2012. Application of alternative technologies for elimination of artificial colorings in alcoholic beverages produced by *Citrus medica* and potential impact on human health. *Food Nutrition Sci* 3:959-969.
- Rezende CM and Fraga SRG. 2003. Chemical and aroma determination of the pulp and seeds of murici (*Byrsonima crassifolia* L.). *J Braz Chem Soc* 14:425-428.
- Shimoda M, Shigematsu H, Shiratsuchi H and Osajima Y. 1995. Comparison of the odor concentrates by SDE and adsorptive column method from green tea infusion. *J Agric Food Chem* 43:1616-1620.
- Shiratsuchi H, Shimoda M, Imayoshi K, Noda K and Osajima Y. 1994. Volatile flavor compounds in spray-dried skim milk powder. *J Agric Food Chem* 42:984-988.
- Tanaka T, Yamauchi T, Katsumata R and Kiuchi K. 2003. Comparison of volatile components in commercial Itohiki-Natto by solid phase microextraction and gas chromatography. *Nippon Shokuhin Kagaku Kogaku Kaishi* 50:278-285.
- Tatsuka K, Suekane S, Sakai Y and Sumitani H. 1990. Volatile constituents of kiwi fruit flowers: Simultaneous distillation and extraction versus headspace sampling. *J Agric Food Chem* 38:2176-2180.
- Umamo K and Shibamoto T. 1998. Analysis of headspace volatiles from overheated beef fat. *J Agric Food Chem* 35:14-18.
- Umamo K, Shoji A, Hagi Y and Shibamoto T. 1986. Volatile constituents of peel of quince fruit, *Cydonia oblonga* Miller. *J Agric Food Chem* 34:593-596.
- Umamo K, Hagi Y, Nakahara K, Shyoji A and Shibamoto T. 1995. Volatile chemicals formed in the headspace of a heated D-glucose/L-cysteine Maillard model system. *J Agric Food Chem* 43:2212-2218.
- Vinogradov BA. 2004. Production, composition, properties and application of essential oils. Retrieved from <http://viness.narod.ru>.
- Welke JE, Manfroi V, Zanusi M, Lazarotto M and Zini CA. 2012. Characterization of the volatile profile of Brazilian Merlot wines through comprehensive two-dimensional gas chromatography time-of-flight mass spectrometric detection. *J Chromatogr A* 1226:124-139.
- Wong KC and Teng YE. 1994. Volatile components of *Mimusops elengi* L. flowers. *J Essent Oil Res* 6:453-458.
- Zhao Y, Li J, Xu Y, Fan W and Jiang W. 2009. Characterization of aroma compounds of four brandies by Aroma Extract Dilution Analysis. *Am J Enol Vitic* 60:269-276.
